# Supplementary material
Source: publisher figshare collection journal article supplement (https://frontiersin.figshare.com/ndownloader/files/28221255)
Supplement: Supplementary file 1 [file 28221255]

**Table S1.** Estimated value of interbreeding rate (*γ*) between Neanderthals and modern humans estimated with an Approximate Bayesian Computation approach. Three different estimations are presented with different levels of tolerance. The tolerance level represents the proportion of retained simulation closest to the observed introgression of 2% from Neanderthal into modern humans. The total number of simulations is 400,000. The estimated value of interbreeding is presented with the mode and a 95% confidence interval (C.I.).

| Tolerance 1% | | Tolerance 2% | | Tolerance 5% | |
| --- | --- | --- | --- | --- | --- |
| Mode | 95% C.I. | Mode | 95% C.I. | Mode | 95% C.I. |
| 0.0084 | [0.0044-0.0130] | 0.0082 | [0.0044-0.0131] | 0.007 | [0.0049-0.0128] |
